# Supplementary figures and images for: Bidirectional feature pyramid attention-based temporal convolutional network model for motor imagery electroencephalogram classification
Source: Frontiers journal article supplement (doi:10.3389/fnbot.2024.1343249), 2024-01-30

## Temporal Convolutional Network(TCN)

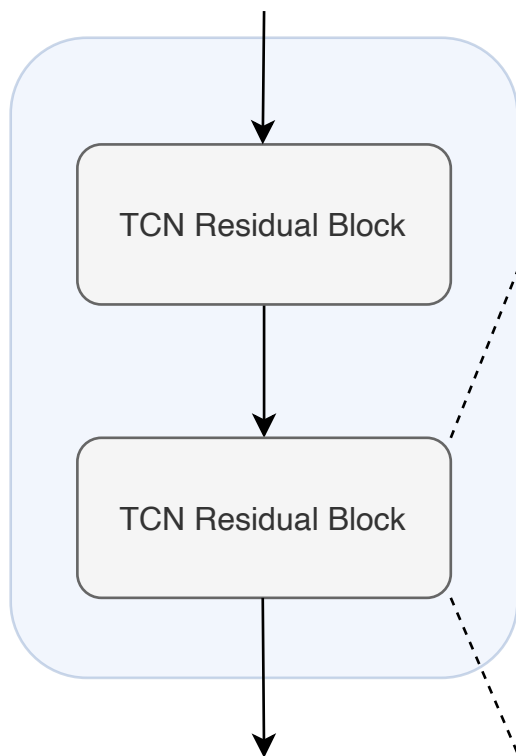

## TCN Residual Block

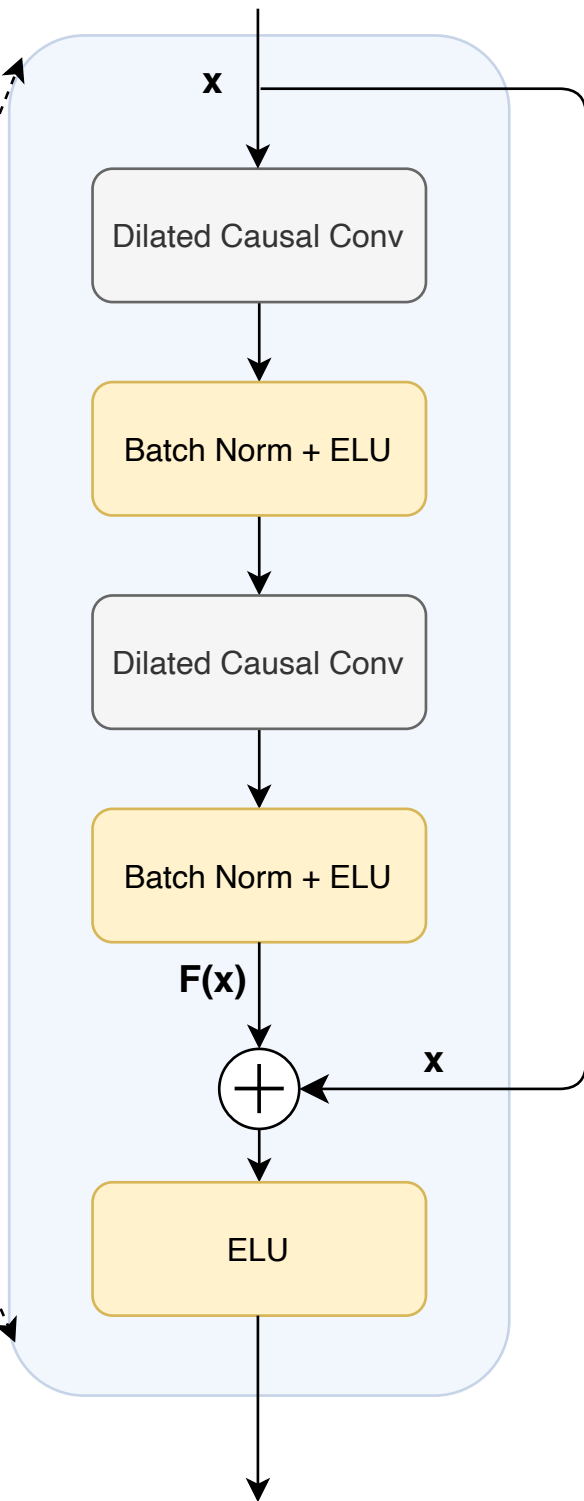

Supplement: Data_Sheet_4.PDF [file Data_Sheet_4.PDF]
